# Supplementary material for: Self-catalysis induced three-dimensional SiOx nanostructures
Source: Royal Society of Chemistry journal article supplement (doi:10.1039/c1ce05188a), 2011-01-01
Supplement: c1ce05188a.pdf [file c1ce05188a.pdf]

## Supporting Information

Self-catalysis induced three-dimensional SiO<sub>x</sub> nanostructures

*Luwei Sun, Haiping He\*, Chao Liu, Zhizhen Ye*

\* Corresponding authors. E-mail: [hphe@zju.edu.cn](mailto:hphe@zju.edu.cn); Tel: 86-571-87953139. Fax: 86-571-87952625 State Key Laboratory of Silicon Materials, Zhejiang University.

### 1. HAADF-STEM dark-field image and EDS analysis of silica nanowires

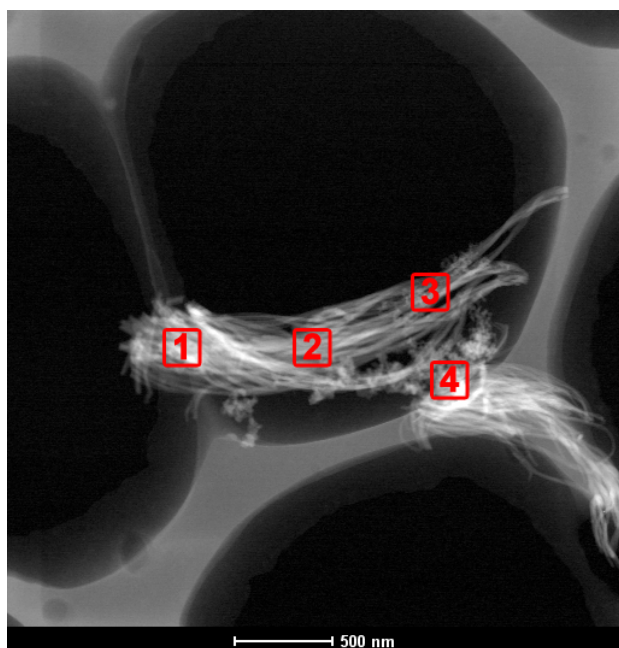

Figure S1 HAADF-STEM dark-field image of silica nanowires. The EDS analysis is performed in four typical areas as marked (1)-(4) in the image.

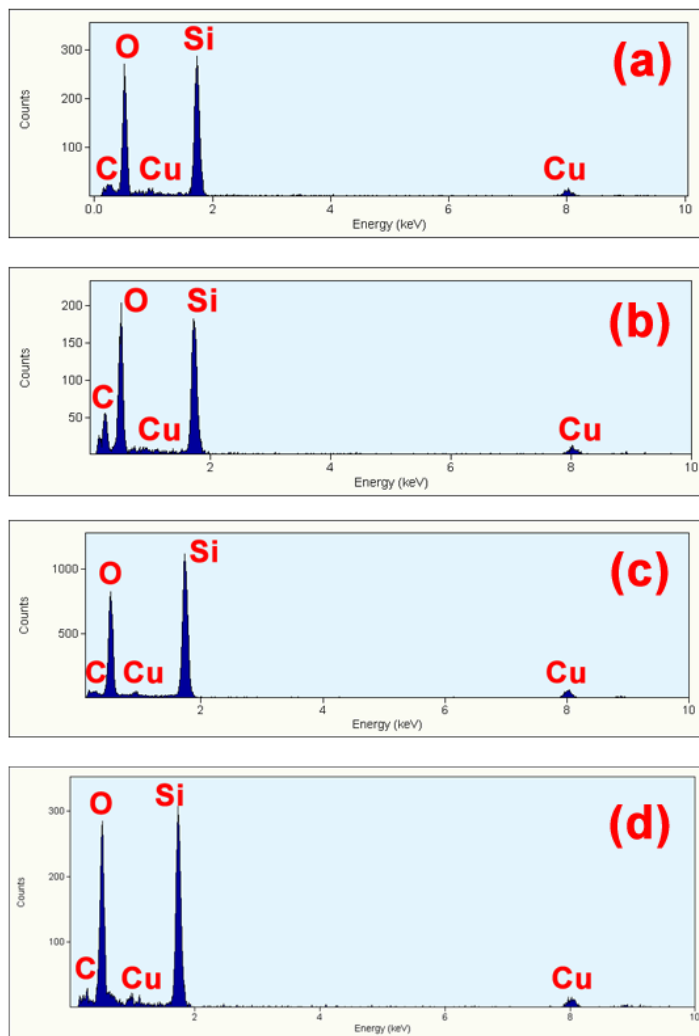

Figure S2 EDS patterns of as-grown silica nanowires. Figure S2 (a) - (d) are patterns corresponding to (1) – (4) in Figure S1. All patterns show no gallium to be detected.
